# Supplementary material
Source: PubMed Central journal article supplement (PMC7941176)
Supplement: mmc1.pdf [file mmc1.pdf]

## Supplemental information

### Two-component spike nanoparticle vaccine protects macaques from SARS-CoV-2 infection

**Philip J.M. Brouwer, Mitch Brinkkemper, Pauline Maisonnasse, Nathalie Dereuddre-Bosquet, Marloes Grobben, Mathieu Claireaux, Marlon de Gast, Romain Marlin, Virginie Chesnais, Ségolène Diry, Joel D. Allen, Yasunori Watanabe, Julia M. Giezen, Gius Kerster, Hannah L. Turner, Karlijn van der Straten, Cynthia A. van der Linden, Yoann Aldon, Thibaut Naninck, Ilja Bontjer, Judith A. Burger, Meliawati Poniman, Anna Z. Mykytyn, Nisreen M.A. Okba, Edith E. Schermer, Marielle J. van Breemen, Rashmi Ravichandran, Tom G. Caniels, Jelle van Schooten, Nidhal Kahlaoui, Vanessa Contreras, Julien Lemaître, Catherine Chapon, Raphaël Ho Tsong Fang, Julien Villaudy, Kwinten Sliepen, Yme U. van der Velden, Bart L. Haagmans, Godelieve J. de Bree, Eric Ginoux, Andrew B. Ward, Max Crispin, Neil P. King, Sylvie van der Werf, Marit J. van Gils, Roger Le Grand, and Rogier W. Sanders**

Table S1 SARS-CoV-2 pseudovirus and authentic virus serum neutralization (ID50s) in BLAB/c mice and rabbits, related to figure 3.

Pseudovirus neutralization

|         | Animal ID | Week -1/0 | Week 6 | Week 14 |
|---------|-----------|-----------|--------|---------|
| Mice    | 1         |           | 75063  | n.d.    |
|         | 2         | <100*     | 25593  | 63015   |
|         | 3         |           | 2588   | 231100  |
|         | 4         | <100*     | 23399  | 63418   |
|         | 5         |           | 2992   | n.d.    |
|         | 6         | <100*     | 8179   | 17235   |
|         | 7         |           | 14035  | 35046   |
|         | 8         | <100*     | 19548  | 18749   |
| Rabbits | 1         | <100      | 68298  | 34813   |
|         | 2         | <100      | 41968  | 76139   |
|         | 3         | <100      | 41162  | 135128  |
|         | 4         | <100      | 77885  | 152796  |
|         | 5         | <100      | 90884  | 186147  |

Authentic virus neutralization

|         | Animal ID | Week 14 |
|---------|-----------|---------|
| Mice    | 1         | n.d.    |
|         | 2         | 6700    |
|         | 3         | 9716    |
|         | 4         | 4651    |
|         | 5         | n.d.    |
|         | 6         | 1649    |
|         | 7         | 3478    |
|         | 8         | 3068    |
| Rabbits | 1         | 4514    |
|         | 2         | 28180   |
|         | 3         | 15110   |
|         | 4         | 10138   |
|         | 5         | 30851   |

n.d. Not determined  
 <100  
 101 - 1,000 ID50  
 1,001 - 10,000 ID50  
 10,001 - 100,000 ID50  
 >100,001 ID50

\*Samples were pooled

Table S2. SARS-CoV-2 pseudovirus and authentic virus neutralization titers (ID50s) in cynomolgus macaques, related to figure 5.

Pseudovirus neutralization

|                     | Animal ID | Week 0 | Week 2 | Week 4 | Week 6 | Week 8 | Week 10 | Week 12 | Week 14 | Week 15 | Week 18 |
|---------------------|-----------|--------|--------|--------|--------|--------|---------|---------|---------|---------|---------|
| Control macaques    | MF1       | n.d.   | n.d.   | n.d.   | n.d.   | n.d.   | n.d.    | <100    | 112     | 452     | 299     |
|                     | MF2       | n.d.   | n.d.   | n.d.   | n.d.   | n.d.   | n.d.    | <100    | 6583    | 1553    | 311     |
|                     | MF3       | n.d.   | n.d.   | n.d.   | n.d.   | n.d.   | n.d.    | <100    | 1818    | 1442    | 571     |
|                     | MF4       | n.d.   | n.d.   | n.d.   | n.d.   | n.d.   | n.d.    | <100    | 381     | 344     | <100    |
| Vaccinated macaques | MF5       | <100   | 162    | 251    | 11340  | 9179   | 3043    | 30766   | 8212    | 6615    | 3782    |
|                     | MF6       | <100   | 912    | <100   | 2981   | 1324   | 1469    | 10720   | 10384   | 4415    | 2690    |
|                     | MF7       | <100   | 584    | <100   | 10171  | 6646   | 2780    | 29198   | 12679   | 10476   | 5322    |
|                     | MF8       | <100   | 599    | <100   | 5087   | 3894   | 3150    | 30080   | 20526   | 4507    | 2762    |
|                     | MF9       | <100   | 183    | <100   | 22450  | 30300  | 22328   | 23523   | 32909   | 11352   | 5680    |
|                     | MF10      | <100   | <100   | 2515   | 7558   | 2991   | 1101    | 17128   | 19730   | 4376    | 8544    |

Authentic virus neutralization

|                     | Animal ID | Week 0 | Week 6 | Week 12 |
|---------------------|-----------|--------|--------|---------|
| Control macaques    | MF1       | n.d.   | n.d.   | n.d.    |
|                     | MF2       | n.d.   | n.d.   | n.d.    |
|                     | MF3       | n.d.   | n.d.   | n.d.    |
|                     | MF4       | n.d.   | n.d.   | n.d.    |
| Vaccinated macaques | MF5       | <20    | 792    | 4190    |
|                     | MF6       | <20    | 166    | 1239    |
|                     | MF7       | <20    | 2155   | 5095    |
|                     | MF8       | <20    | 1629   | 1913    |
|                     | MF9       | <20    | 3040   | 3694    |
|                     | MF10      | <20    | 1372   | 4851    |

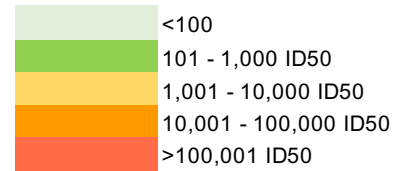

Authentic virus neutralization post challenge

|                     | Animal ID | Week 12 | Week 15 | Week 18 |
|---------------------|-----------|---------|---------|---------|
| Control macaques    | MF1       | <20     | 813     | 94      |
|                     | MF2       | <20     | 1110    | 32      |
|                     | MF3       | <20     | 444     | 137     |
|                     | MF4       | <20     | <20     | <20     |
| Vaccinated macaques | MF5       | 2519    | 2528    | 2469    |
|                     | MF6       | 2456    | 3963    | 2840    |
|                     | MF7       | 11069   | 8586    | 5102    |
|                     | MF8       | 8782    | 3020    | 665     |
|                     | MF9       | 8606    | 11036   | 2842    |
|                     | MF10      | 6345    | 3321    | 1190    |
